# Supplementary material for: Functional mechanism of hsa-miR-128-3p in epithelial-mesenchymal transition of pancreatic cancer cells via ZEB1 regulation
Source: PeerJ. 2022 Feb 3;10:e12802. doi: 10.7717/peerj.12802 (PMC8818272; doi:10.7717/peerj.12802)
Supplement: Supplemental Information 49 [file peerj-10-12802-s049.xlsx]

## Sheet: figure 1
A
correlation between miR-128-3p expression and poor prognosis of PC was analyzed in the ENCORI database
B
the morphology of normal pancreatic cell line and PC cell lines with different degrees of malignancy was observed under the light microscope
C
expressions of epithelial phenotype marker E-cadherin and mesenchymal phenotype marker N-cadherin were determined by Western blot
E-cadherin	HPDE6C7	AsPC-1	BxPC-3	CFPAC-1	PANC-1
1	0.84	0.63	0.53	0.19	0.13
2	0.89	0.67	0.56	0.2	0.14
3	0.79	0.59	0.5	0.18	0.12
average value	0.84	0.63	0.53	0.19	0.31
standard deviation	0.05	0.04	0.03	0.01	0.01
N-cadherin	HPDE6C7	AsPC-1	BxPC-3	CFPAC-1	PANC-1
1	0.05	0.19	0.26	0.58	0.81
2	0.06	0.2	0.27	0.61	0.86
3	0.04	0.18	0.25	0.55	0.76
average value	0.05	0.19	0.26	0.58	0.81
standard deviation	0.01	0.01	0.01	0.03	0.05
D
miR-128-3p expression in normal pancreatic cell line and PC cell lines with different degrees of malignancy was detected by RT-Qpcr
hsa-miR-128-3p level	HPDE6C7	AsPC-1	BxPC-3	CFPAC-1	PANC-1
1	1	0.58	0.38	0.34	0.18
2	1.02	0.61	0.41	0.37	0.2
3	0.98	0.55	0.35	0.31	0.16
average value	1	0.58	0.38	0.34	0.18
standard deviation	0.02	0.03	0.03	0.03	0.02

## Sheet: figure 2
A
miR-128-3p expression in different cells was detected by RT-Qpcr
PANC-1	Blank	miR-mimics NC	miR-mimics
1	1	1.01	5.82
2	1.02	1.04	6.29
3	0.98	0.98	5.29
average value	1	1.01	5.8
standard deviation	0.02	0.03	0.5
AsPC-1	Blank	miR-mimics NC	miR-mimics
1	1	1.01	0.18
2	1.01	1.03	0.19
3	0.99	0.99	0.17
average value	1	1.01	0.18
standard deviation	0.01	0.02	0.01
B
the morphology of different cells was observed under the light microscope
C
expressions of E-cadherin and N-cadherin in PANC-1 cells were determined by Western blot
E-cadherin	Blank	miR-mimics NC	miR-mimics
1	0.13	0.14	0.51
2	0.14	0.15	0.54
3	0.12	0.13	0.48
average value	0.13	0.14	0.51
standard deviation	0.01	0.01	0.03
N-cadherin	Blank	miR-mimics NC	miR-mimics
1	0.74	0.75	0.26
2	0.77	0.78	0.27
3	0.71	0.72	0.25
average value	0.74	0.75	0.26
standard deviation	0.03	0.03	0.01
D
expressions of E-cadherin and N-cadherin in AsPC-1 cells were determined by Western blot
E-cadherin	Blank	miR-inhi NC	miR-inhi
1	0.63	0.61	0.25
2	0.66	0.63	0.26
3	0.6	0.59	0.24
average value	0.63	0.61	0.25
standard deviation	0.03	0.02	0.01
N-cadherin	Blank	miR-inhi NC	miR-inhi
1	0.19	0.18	0.64
2	0.2	0.19	0.67
3	0.18	0.17	0.61
average value	0.19	0.18	0.64
standard deviation	0.01	0.01	0.03

## Sheet: figure 3
A
invasive and migrating abilities of PANC-1 cells were evaluated by Transwell assays
Invasion	Blank	miR-mimics NC	miR-mimics
1	23.04	22.13	8.62
2	23.78	22.78	9.09
3	22.18	21.38	8.09
average value	23	22.1	8.6
standard deviation	0.8	0.7	0.5
Migration	Blank	miR-mimics NC	miR-mimics
1	36.06	35.26	12.72
2	37.17	36.57	13.19
3	34.77	33.77	12.19
average value	36	35.2	12.7
standard deviation	1.2	1.4	0.5
B
invasive and migrating abilities of AsPC-1 cells were evaluated by Transwell assays
Invasion	Blank	miR-inhi NC	miR-inhi
1	14.32	14.83	26.74
2	14.79	15.39	27.48
3	13.79	14.19	25.88
average value	14.3	14.8	26.7
standard deviation	0.5	0.6	0.8
Migration	Blank	miR-inhi NC	miR-inhi
1	18.03	17.83	37.65
2	18.59	18.39	38.67
3	17.39	17.19	36.48
average value	18	17.8	37.6
standard deviation	0.6	0.6	1.1

## Sheet: figure 4
A
correlation between ZEB1 expression and poor prognosis of PC was analyzed in the ENCORI database
B
correlation between miR-128-33p and ZEB1 was analyzed in the ENCORI database
C
binding sites of miR-128-3p and ZEB1 3’UTR were predicted on the TargetScan database
D
target relationship of miR-128-3p and ZEB1 was verified by a dual-luciferase reporter assay
ZEB1-WT	miR-mimics NC	miR-mimics		ZEB1-MUT	miR-mimics NC	miR-mimics
1	1	0.42		1	1.01	0.99
2	1.02	0.43		2	1.03	1.01
3	0.98	0.41		3	0.99	0.97
average value	1	0.42		average value	1.01	0.99
standard deviation	0.02	0.01		standard deviation	0.02	0.02
ZEB1-WT	miR-inhi NC	miR-inhi		ZEB1-MUT	miR-inhi NC	miR-inhi
1	1	2.58		1	1.01	0.99
2	1.02	2.61		2	1.03	1.01
3	0.98	2.55		3	0.99	0.97
average value	1	2.58		average value	1.01	0.99
standard deviation	0.02	0.03		standard deviation	0.02	0.02
E
mRNA expression of ZEB1 in PANC-1 cells was detected by RT-Qpcr
ZEB1 mRNA level	Blank	miR-mimics NC	miR-mimics
1	1	1.01	0.32
2	1.02	1.03	0.33
3	0.98	0.99	0.31
average value	1	1.01	0.32
standard deviation	0.02	0.02	0.01
F
protein expression of ZEB1 in PANC-1 cells was detected by Western blot
G
protein expression of ZEB1 in PANC-1 cells was detected by Western blot
ZEB1 Protein level/β-actin	Blank	miR-mimics NC	miR-mimics
1	0.68	0.66	0.18
2	0.71	0.69	0.19
3	0.65	0.63	0.17
average value	0.68	0.66	0.18
standard deviation	0.03	0.03	0.01
H
mRNA expression of ZEB1 in AsPC-1 cells was detected by RT-Qpcr
ZEB1 mRNA level	Blank	miR-inhi NC	miR-inhi
1	1	1.01	3.6
2	1.02	1.03	3.65
3	0.98	0.99	3.55
average value	1	1.01	3.6
standard deviation	0.02	0.02	0.05
I
protein expression of ZEB1 in AsPC-1 cells was detected by Western blot
J
protein expression of ZEB1 in AsPC-1 cells was detected by Western blot
ZEB1 Protein level/β-actin	Blank	miR-inhi NC	miR-inhi
1	0.17	0.18	0.73
2	0.18	0.19	0.76
3	0.16	0.17	0.7
average value	0.17	0.18	0.73
standard deviation	0.01	0.01	0.03

## Sheet: figure 5
A
ZEB1 expression in PANC-1 cells and AsPC-1 cells was detected by RT-qPCR and Western blot
ZEB1 mRNA level	miR-mimics	miR-mimics+oe-NC	miR-mimics+oe-ZEB1		ZEB1 Protein level/β-actin	miR-mimics	miR-mimics+oe-NC	miR-mimics+oe-ZEB1		ZEB1 mRNA level	miR-inhi	miR-inhi +si-NC	miR-inhi +si-ZEB1		ZEB1 Protein level/β-actin	miR-inhi	miR-inhi +si-NC	miR-inhi +si-ZEB1
1	0.32	0.33	1.26		1	0.18	0.17	0.86		1	3.6	3.5	1.16		1	0.73	0.74	0.21
2	0.33	0.34	1.28		2	0.19	0.18	0.88		2	3.65	3.6	1.19		2	0.76	0.77	0.22
3	0.31	0.32	1.24		3	0.17	0.16	0.84		3	3.55	3.4	1.13		3	0.7	0.71	0.2
average value	0.32	0.33	1.26		average value	0.18	0.17	0.86		average value	3.6	3.5	1.16		average value	0.73	0.74	0.21
standard deviation	0.01	0.01	0.02		standard deviation	0.01	0.01	0.02		standard deviation	0.05	0.1	0.03		standard deviation	0.03	0.03	0.01
B
the morphology of PANC-1 cells and AsPC-1 cells was observed under the light microscope
C
expressions of markers of epithelial mesenchymal transition in PANC-1 cells and AsPC-1 cells were determined by Western blot
E-cadherin	miR-mimics	miR-mimics+oe-NC	miR-mimics+oe-ZEB1		N-cadherin	miR-mimics	miR-mimics+oe-NC	miR-mimics+oe-ZEB1
1	0.51	0.5	0.18		1	0.26	0.25	0.64
2	0.54	0.53	0.19		2	0.27	0.26	0.66
3	0.48	0.47	0.17		3	0.25	0.24	0.62
average value	0.51	0.5	0.18		average value	0.26	0.25	0.64
standard deviation	0.03	0.03	0.01		standard deviation	0.01	0.01	0.02
E-cadherin	miR-inhi	miR-inhi +si-NC	miR-inhi +si-ZEB1		N-cadherin	miR-inhi	miR-inhi +si-NC	miR-inhi +si-ZEB1
1	0.25	0.24	0.48		1	0.64	0.63	0.26
2	0.26	0.25	0.5		2	0.67	0.66	0.27
3	0.24	0.23	0.46		3	0.61	0.6	0.25
average value	0.25	0.24	0.48		average value	0.64	0.63	0.26
standard deviation	0.01	0.01	0.02		standard deviation	0.03	0.03	0.01
D
invasion and migration rates of PANC-1 cells and AsPC-1 cells were detected by Transwell assays
Invasion	miR-mimics	miR-mimics+oe-NC	miR-mimics+oe-ZEB1		Migration	miR-mimics	miR-mimics+oe-NC	miR-mimics+oe-ZEB1
1	8.62	8.52	21.34		1	12.72	12.92	29.85
2	9.09	8.99	22.08		2	13.19	13.39	30.87
3	8.09	7.99	20.48		3	12.19	12.39	28.68
average value	8.6	8.5	21.3		average value	12.7	12.9	29.8
standard deviation	0.5	0.5	0.8		standard deviation	0.5	0.5	1.1
Invasion	miR-inhi	miR-inhi +si-NC	miR-inhi +si-ZEB1		Migration	miR-inhi	miR-inhi +si-NC	miR-inhi +si-ZEB1
1	26.74	26.14	7.81		1	37.65	37.25	13.23
2	27.48	26.88	8.09		2	38.67	38.18	13.79
3	25.88	25.28	7.49		3	36.48	36.18	12.59
average value	26.7	26.1	7.8		average value	37.6	37.2	13.2
standard deviation	0.8	0.8	0.3		standard deviation	1.1	1	0.6
